# Supplementary material
Source: HighWire-hosted journal article supplement (https://bmjopen.bmj.com/content/9/3/e024680)
Supplement: inline-supplementary-material-2 [file inline-supplementary-material-2.pdf]

# Supplementary Tables

**Supplementary Table 1: Crude and Adjusted odds ratios for factors associated with overweight and obesity compared to normal weight among women of Myanmar, MDHS 2015-16.**

| Variable                    | Crude Odds Ratio (COR) | 95% CI      | <i>p</i> -value <sup>1</sup> | Adjusted Odds Ratio (AOR) | 95% CI    | <i>p</i> -value <sup>1</sup> |
|-----------------------------|------------------------|-------------|------------------------------|---------------------------|-----------|------------------------------|
| <b>Age Group (in years)</b> |                        |             |                              |                           |           |                              |
| 15-24                       | Ref                    |             |                              | Ref                       |           |                              |
| 25-34                       | 3.11                   | 2.73-3.54   | <b>&lt;0.001</b>             | 2.34                      | 2.01-2.73 | <b>&lt;0.001</b>             |
| 35-49                       | 5.21                   | 4.66 - 5.83 | <b>&lt;0.001</b>             | 3.65                      | 3.14-4.26 | <b>&lt;0.001</b>             |
| <b>Place of Residence</b>   |                        |             |                              |                           |           |                              |
| Urban                       | Ref                    |             |                              | Ref                       |           |                              |
| Rural                       | 0.54                   | 0.47-0.61   | <b>&lt;0.001</b>             | 0.74                      | 0.64-0.87 | <b>&lt;0.001</b>             |
| <b>Region of Residence</b>  |                        |             |                              |                           |           |                              |
| Kachin                      | Ref                    |             |                              | Ref                       |           |                              |
| Kayah                       | 0.68                   | 0.49-0.94   | <b>0.019</b>                 | 0.68                      | 0.50-0.92 | <b>0.012</b>                 |
| Kayin                       | 0.84                   | 0.64-1.10   | 0.202                        | 0.88                      | 0.69-1.12 | 0.301                        |
| Chin                        | 0.45                   | 0.33-0.61   | <b>&lt;0.001</b>             | 0.50                      | 0.38-0.66 | <b>&lt;0.001</b>             |

|                                   |      |           |                  |      |           |                  |
|-----------------------------------|------|-----------|------------------|------|-----------|------------------|
| Sagaing                           | 0.85 | 0.65-1.11 | 0.234            | 0.88 | 0.67-1.15 | 0.343            |
| Taninthayi                        | 0.91 | 0.70-1.17 | 0.459            | 1.03 | 0.78-1.36 | 0.832            |
| Bago                              | 0.65 | 0.51-0.82 | <b>&lt;0.001</b> | 0.68 | 0.54-0.87 | <b>0.002</b>     |
| Magway                            | 0.56 | 0.43-0.74 | <b>&lt;0.001</b> | 0.60 | 0.46-0.77 | <b>&lt;0.001</b> |
| Mandalay                          | 0.67 | 0.52-0.87 | 0.002            | 0.64 | 0.50-0.82 | <b>&lt;0.001</b> |
| Mon                               | 0.84 | 0.64-1.11 | 0.217            | 0.87 | 0.63-1.20 | 0.381            |
| Rakhine                           | 0.39 | 0.29-0.52 | <b>&lt;0.001</b> | 0.61 | 0.45-0.82 | <b>0.001</b>     |
| Yangon                            | 1.18 | 0.90-1.55 | 0.224            | 0.98 | 0.75-1.27 | 0.854            |
| Shan                              | 0.81 | 0.60-1.09 | 0.165            | 0.91 | 0.68-1.20 | 0.486            |
| Ayeyarwaddy                       | 0.66 | 0.50-0.88 | 0.005            | 0.81 | 0.61-1.08 | 0.152            |
| Naypyitaw                         | 0.69 | 0.53-0.90 | 0.006            | 0.68 | 0.52-0.90 | <b>0.008</b>     |
| <b>Highest Educational Status</b> |      |           |                  |      |           |                  |
| No Formal Education               | Ref  |           |                  | Ref  |           |                  |
| Primary                           | 1.29 | 1.13-1.48 | <b>&lt;0.001</b> | 1.24 | 1.06-1.45 | <b>0.006</b>     |
| Secondary                         | 1.13 | 0.97-1.32 | 0.115            | 1.26 | 1.04-1.53 | <b>0.018</b>     |
| Higher                            | 1.50 | 1.22-1.83 | <b>&lt;0.001</b> | 1.10 | 0.86-1.40 | 0.452            |
| <b>Currently employment</b>       |      |           |                  |      |           |                  |
| No                                | Ref  |           |                  |      |           |                  |

|                                 |      |           |        |      |           |        |
|---------------------------------|------|-----------|--------|------|-----------|--------|
| Yes                             | 1.02 | 0.91-1.13 | 0.762  |      |           |        |
| <b>Wealth index</b>             |      |           |        |      |           |        |
| Poorest                         | Ref  |           |        | Ref  |           |        |
| Poorer                          | 1.49 | 1.29-1.72 | <0.001 | 1.46 | 1.24-1.72 | <0.001 |
| Middle                          | 1.87 | 1.61-2.18 | <0.001 | 1.92 | 1.62-2.28 | <0.001 |
| Richer                          | 2.31 | 1.97-2.72 | <0.001 | 2.26 | 1.88-2.72 | <0.001 |
| Rich                            | 3.16 | 2.68-3.72 | <0.001 | 2.82 | 2.28-3.48 | <0.001 |
| <b>Marital Status</b>           |      |           |        |      |           |        |
| Single                          | Ref  |           |        | Ref  |           |        |
| Married                         | 3.03 | 2.73-3.37 | <0.001 | 1.60 | 1.30-1.98 | <0.001 |
| Separated/ Divorced/<br>Widowed | 2.10 | 1.75-2.51 | <0.001 | 1.03 | 0.80-1.32 | 0.820  |
| <b>Parity</b>                   |      |           |        |      |           |        |
| 0                               | Ref  |           |        | Ref  |           |        |
| 1                               | 2.42 | 2.13-2.75 | <0.001 | 1.44 | 1.15-1.81 | 0.002  |
| 2                               | 3.13 | 2.73-3.59 | <0.001 | 1.50 | 1.19-1.88 | 0.001  |
| 3                               | 3.53 | 3.07-4.06 | <0.001 | 1.61 | 1.29-2.02 | <0.001 |

|                                   |      |           |                  |      |           |              |
|-----------------------------------|------|-----------|------------------|------|-----------|--------------|
| 3+                                | 2.62 | 2.30-2.99 | <b>&lt;0.001</b> | 1.42 | 1.13-1.79 | <b>0.003</b> |
| <b>Number of Household Member</b> |      |           |                  |      |           |              |
| ≤5                                | Ref  |           |                  | Ref  |           |              |
| >5                                | 0.83 | 0.76-0.92 | <b>&lt;0.001</b> | 0.92 | 0.83-1.03 | 0.150        |
| <b>Frequency of watching TV</b>   |      |           |                  |      |           |              |
| Not at all                        | Ref  |           |                  | Ref  |           |              |
| Less than once a week             | 1.20 | 1.03-1.40 | <b>0.020</b>     | 1.01 | 0.87-1.19 | 0.870        |
| At least once a week              | 1.49 | 1.32-1.69 | <b>&lt;0.001</b> | 1.16 | 1.02-1.32 | <b>0.023</b> |

*MDHS: Myanmar Demographic and Health Survey*

*CI: Confidence Interval*

<sup>1</sup> Variable with p-value less than <0.2 from unadjusted model were included into multivariable analysis

**Supplementary Table 2: Crude odds ratios for factors associated with overweight and obesity compared to normal weight for urban area among women of Myanmar, MDHS 2015-16.**

| Variable                    | Crude Odds Ratio (COR) | 95% CI    | <i>p</i> -value <sup>1</sup> | Adjusted Odds Ratio (AOR) | 95% CI    | <i>p</i> -value <sup>1</sup> |
|-----------------------------|------------------------|-----------|------------------------------|---------------------------|-----------|------------------------------|
| <b>Age Group (in years)</b> |                        |           |                              |                           |           |                              |
| 15-24                       | Ref                    |           |                              | Ref                       |           |                              |
| 25-34                       | 3.43                   | 2.72-4.33 | <b>&lt;0.001</b>             | 2.67                      | 2.07-3.44 | <b>&lt;0.001</b>             |
| 35-49                       | 7.63                   | 6.32-9.21 | <b>&lt;0.001</b>             | 5.52                      | 4.30-7.08 | <b>&lt;0.001</b>             |
| <b>Region of Residence</b>  |                        |           |                              |                           |           |                              |
| Kachin                      | Ref                    |           |                              | Ref                       |           |                              |
| Kayah                       | 0.70                   | 0.42-1.19 | 0.188                        | 0.63                      | 0.38-1.05 | 0.075                        |
| Kayin                       | 0.95                   | 0.75-1.19 | 0.646                        | 0.94                      | 0.69-1.28 | 0.675                        |
| Chin                        | 0.76                   | 0.56-1.02 | 0.070                        | 0.71                      | 0.51-0.99 | <b>0.041</b>                 |
| Sagaing                     | 0.96                   | 0.72-1.28 | 0.790                        | 0.99                      | 0.70-1.40 | 0.943                        |
| Taninthayi                  | 0.62                   | 0.47-0.82 | <b>0.001</b>                 | 0.61                      | 0.38-0.98 | <b>0.042</b>                 |
| Bago                        | 0.71                   | 0.53-0.93 | <b>0.015</b>                 | 0.62                      | 0.43-0.89 | <b>0.010</b>                 |
| Magway                      | 0.59                   | 0.36-0.97 | <b>0.038</b>                 | 0.50                      | 0.29-0.86 | <b>0.013</b>                 |
| Mandalay                    | 0.98                   | 0.79-1.22 | 0.848                        | 0.85                      | 0.62-1.18 | 0.334                        |

|                                   |      |           |              |      |           |              |
|-----------------------------------|------|-----------|--------------|------|-----------|--------------|
| Mon                               | 0.77 | 0.49-1.20 | 0.243        | 0.62 | 0.32-1.20 | 0.154        |
| Rakhine                           | 0.61 | 0.41-0.89 | <b>0.012</b> | 0.60 | 0.43-0.83 | <b>0.002</b> |
| Yangon                            | 1.00 | 0.76-1.34 | 0.975        | 1.01 | 0.71-1.46 | 0.944        |
| Shan                              | 1.03 | 0.69-1.55 | 0.885        | 1.05 | 0.65-1.70 | 0.839        |
| Ayeyarwaddy                       | 0.74 | 0.52-1.06 | 0.099        | 0.89 | 0.55-1.44 | 0.632        |
| Naypyitaw                         | 0.80 | 0.51-1.25 | 0.322        | 0.75 | 0.49-1.15 | 0.181        |
| <b>Highest Educational Status</b> |      |           |              |      |           |              |
| No Formal Education               | Ref  |           |              | Ref  |           |              |
| Primary                           | 1.14 | 0.84-1.56 | 0.389        | 1.10 | 0.76-1.58 | 0.605        |
| Secondary                         | 0.78 | 0.57-1.06 | 0.107        | 1.13 | 0.76-1.68 | 0.530        |
| Higher                            | 0.84 | 0.59-1.20 | 0.346        | 0.92 | 0.61-1.40 | 0.704        |
| <b>Currently employment</b>       |      |           |              |      |           |              |
| No                                | Ref  |           |              | Ref  |           |              |
| Yes                               | 1.22 | 1.00-1.49 | <b>0.046</b> | 1.29 | 1.06-1.56 | <b>0.010</b> |
| <b>Wealth index</b>               |      |           |              |      |           |              |
| Poorest                           | Ref  |           |              | Ref  |           |              |
| Poorer                            | 1.35 | 0.76-2.37 | 0.302        | 1.44 | 0.69-2.99 | 0.330        |

|                                       |      |           |                  |      |           |              |
|---------------------------------------|------|-----------|------------------|------|-----------|--------------|
| Middle                                | 1.53 | 0.94-2.50 | 0.089            | 1.99 | 1.09-3.64 | <b>0.025</b> |
| Richer                                | 2.14 | 1.28-3.57 | <b>0.004</b>     | 2.65 | 1.43-4.91 | <b>0.002</b> |
| Rich                                  | 2.43 | 1.47-4.02 | <b>0.001</b>     | 3.08 | 1.63-5.82 | <b>0.001</b> |
| <b>Marital Status</b>                 |      |           |                  |      |           |              |
| Single                                | Ref  |           |                  | Ref  |           |              |
| Married                               | 3.21 | 2.73-3.78 | <b>&lt;0.001</b> | 1.46 | 1.01-2.11 | <b>0.042</b> |
| Separated/ Divorced/<br>Widowed       | 2.67 | 2.01-3.55 | <b>&lt;0.001</b> | 1.05 | 0.70-1.56 | 0.828        |
| <b>Parity</b>                         |      |           |                  |      |           |              |
| 0                                     | Ref  |           |                  | Ref  |           |              |
| 1                                     | 2.61 | 2.05-3.33 | <b>&lt;0.001</b> | 1.36 | 0.89-2.08 | 0.152        |
| 2                                     | 3.21 | 2.60-3.96 | <b>&lt;0.001</b> | 1.27 | 0.87-1.85 | 0.221        |
| 3                                     | 3.95 | 3.01-5.20 | <b>&lt;0.001</b> | 1.50 | 1.03-2.18 | <b>0.034</b> |
| 3+                                    | 3.91 | 2.96-5.17 | <b>&lt;0.001</b> | 1.44 | 0.97-2.14 | 0.072        |
| <b>Number of Household<br/>Member</b> |      |           |                  |      |           |              |
| ≤5                                    | Ref  |           |                  | Ref  |           |              |
| >5                                    | 0.94 | 0.79-1.11 | 0.449            | 1.13 | 0.92-1.38 | 0.250        |

| Frequency of watching TV* |      |           |       |      |           |       |
|---------------------------|------|-----------|-------|------|-----------|-------|
| Not at all                | Ref  |           |       | Ref  |           |       |
| Less than once a week     | 1.15 | 0.80-1.67 | 0.441 | 1.05 | 0.73-1.51 | 0.779 |
| At least once a week      | 1.25 | 0.93-1.69 | 0.144 | 1.14 | 0.85-1.52 | 0.389 |

*MDHS: Myanmar Demographic and Health Survey*

*CI: Confidence Interval*

<sup>1</sup> Variable with p-value less than <0.2 from unadjusted model were included into multivariable analysis



**Supplementary Table 3: Adjusted odds ratios for factors associated with overweight and obesity compared to normal weight for rural area among women of Myanmar, MDHS 2015-16.**

| Variable                    | Crude Odds Ratio (COR) | 95% CI    | <i>p</i> -value <sup>1</sup> | Adjusted Odds Ratio (AOR) | 95% CI    | <i>p</i> -value <sup>1</sup> |
|-----------------------------|------------------------|-----------|------------------------------|---------------------------|-----------|------------------------------|
| <b>Age Group (in years)</b> |                        |           |                              |                           |           |                              |
| 15-24                       | Ref                    |           |                              | Ref                       |           |                              |
| 25-34                       | 3.10                   | 2.65-3.62 | <b>&lt;0.001</b>             | 2.09                      | 1.75-2.51 | <b>&lt;0.001</b>             |
| 35-49                       | 4.61                   | 4.01-5.30 | <b>&lt;0.001</b>             | 2.89                      | 2.39-3.49 | <b>&lt;0.001</b>             |
| <b>Region of Residence</b>  |                        |           |                              |                           |           |                              |
| Kachin                      | Ref                    |           |                              | Ref                       |           |                              |
| Kayah                       | 0.70                   | 0.46-1.06 | 0.091                        | 0.71                      | 0.48-1.06 | 0.091                        |
| Kayin                       | 0.85                   | 0.58-1.24 | 0.401                        | 0.89                      | 0.63-1.25 | 0.497                        |
| Chin                        | 0.36                   | 0.23-0.57 | <b>&lt;0.001</b>             | 0.43                      | 0.28-0.64 | <b>&lt;0.001</b>             |
| Sagaing                     | 0.90                   | 0.63-1.30 | 0.586                        | 0.88                      | 0.61-1.25 | 0.466                        |
| Taninthayi                  | 1.10                   | 0.77-1.56 | 0.606                        | 1.25                      | 0.88-1.78 | 0.206                        |
| Bago                        | 0.68                   | 0.49-0.94 | <b>0.018</b>                 | 0.72                      | 0.52-0.99 | <b>0.044</b>                 |
| Magway                      | 0.62                   | 0.44-0.87 | <b>0.006</b>                 | 0.62                      | 0.44-0.86 | <b>0.005</b>                 |
| Mandalay                    | 0.58                   | 0.40-0.83 | <b>0.004</b>                 | 0.57                      | 0.40-0.81 | <b>0.002</b>                 |
| Mon                         | 0.90                   | 0.63-1.29 | 0.570                        | 1.03                      | 0.72-1.49 | 0.860                        |
| Rakhine                     | 0.39                   | 0.26-0.58 | <b>&lt;0.001</b>             | 0.63                      | 0.43-0.93 | <b>0.022</b>                 |
| Yangon                      | 1.07                   | 0.77-1.49 | 0.681                        | 1.07                      | 0.75-1.52 | 0.713                        |
| Shan                        | 0.78                   | 0.51-1.17 | 0.222                        | 0.86                      | 0.59-1.24 | 0.418                        |
| Ayeyarwaddy                 | 0.71                   | 0.49-1.03 | 0.074                        | 0.82                      | 0.56-1.18 | 0.282                        |
| Naypyitaw                   | 0.64                   | 0.44-0.93 | <b>0.020</b>                 | 0.67                      | 0.46-0.97 | <b>0.035</b>                 |

| <b>Highest Educational Status</b> |      |           |                  |      |           |                  |
|-----------------------------------|------|-----------|------------------|------|-----------|------------------|
| No Formal Education               | Ref  |           |                  | Ref  |           |                  |
| Primary                           | 1.27 | 1.09-1.47 | <b>&lt;0.001</b> | 1.24 | 1.04-1.47 | <b>0.018</b>     |
| Secondary                         | 0.98 | 0.82-1.17 | 0.84             | 1.26 | 1.00-1.57 | <b>0.047</b>     |
| Higher                            | 1.13 | 0.84-1.52 | 0.40             | 1.18 | 0.84-1.67 | 0.328            |
| <b>Currently employment</b>       |      |           |                  |      |           |                  |
| No                                | Ref  |           |                  |      |           |                  |
| Yes                               | 1.01 | 0.89-1.14 | 0.890            |      |           |                  |
| <b>Wealth index</b>               |      |           |                  |      |           |                  |
| Poorest                           | Ref  |           |                  | Ref  |           |                  |
| Poorer                            | 1.49 | 1.28-1.73 | <b>&lt;0.001</b> | 1.50 | 1.27-1.77 | <b>&lt;0.001</b> |
| Middle                            | 1.87 | 1.59-2.20 | <b>&lt;0.001</b> | 2.00 | 1.67-2.40 | <b>&lt;0.001</b> |
| Richer                            | 2.05 | 1.72-2.45 | <b>&lt;0.001</b> | 2.30 | 1.88-2.81 | <b>&lt;0.001</b> |
| Rich                              | 2.59 | 2.01-3.35 | <b>&lt;0.001</b> | 2.97 | 2.27-3.88 | <b>&lt;0.001</b> |
| <b>Marital Status</b>             |      |           |                  |      |           |                  |
| Single                            | Ref  |           |                  | Ref  |           |                  |
| Married                           | 3.35 | 2.93-3.83 | <b>&lt;0.001</b> | 1.69 | 1.29-2.21 | <b>&lt;0.001</b> |
| Separated/ Divorced/ Widowed      | 1.92 | 1.53-2.42 | <b>&lt;0.001</b> | 0.97 | 0.70-1.36 | 0.877            |
| <b>Parity</b>                     |      |           |                  |      |           |                  |
| 0                                 | Ref  |           |                  | Ref  |           |                  |
| 1                                 | 2.44 | 2.07-2.87 | <b>&lt;0.001</b> | 1.47 | 1.12-1.93 | <b>0.005</b>     |
| 2                                 | 3.37 | 2.83-4.03 | <b>&lt;0.001</b> | 1.63 | 1.22-2.18 | <b>0.001</b>     |
| 3                                 | 3.86 | 3.26-4.57 | <b>&lt;0.001</b> | 1.71 | 1.29-2.28 | <b>&lt;0.001</b> |
| 3+                                | 2.92 | 2.48-3.43 | <b>&lt;0.001</b> | 1.51 | 1.12-2.02 | <b>0.006</b>     |

| Number of Household Member |      |           |                  |      |           |              |
|----------------------------|------|-----------|------------------|------|-----------|--------------|
| ≤5                         | Ref  |           |                  | Ref  |           |              |
| >5                         | 0.74 | 0.66-0.83 | <b>&lt;0.001</b> | 0.83 | 0.73-0.95 | <b>0.005</b> |
| Frequency of watching TV   |      |           |                  |      |           |              |
| Not at all                 | Ref  |           |                  | Ref  |           |              |
| Less than once a week      | 1.11 | 0.93-1.32 | 0.242            | 0.98 | 0.82-1.17 | 0.829        |
| At least once a week       | 1.26 | 1.10-1.44 | <b>0.001</b>     | 1.16 | 1.01-1.34 | <b>0.040</b> |

*MDHS: Myanmar Demographic and Health Survey*

*CI: Confidence Interval*

<sup>1</sup> Variable with *p*-value less than <0.2 from unadjusted model were included into multivariable analysis
